# Supplementary material
Source: MDPI journal article supplement (https://www.mdpi.com/2073-4395/12/7/1635)
Supplement: s1 [file s1]

**Table S1.** Tanimoto similarity and docking scores of the XP screened compounds

| S.No | COCONUT<br>ID | Docking score<br>(kcal/mol) | Tanimoto<br>similarity | S.No | COCONUT<br>ID | Docking<br>score(kcal/mol) | Tanimoto<br>similarity |
|------|---------------|-----------------------------|------------------------|------|---------------|----------------------------|------------------------|
| 1    | CNP0288601    | -12.829                     | 0.269363               | 100  | CNP0236854    | -7.084                     | 0.234263               |
| 2    | CNP0241232    | -12.618                     | 0.270499               | 101  | CNP0259163    | -7.058                     | 0.341994               |
| 3    | CNP0080250    | -12.185                     | 0.331072               | 102  | CNP0114165    | -7.045                     | 0.299689               |
| 4    | CNP0080249    | -11.916                     | 0.318373               | 103  | CNP0240862    | -7.023                     | 0.323723               |
| 5    | CNP0344609    | -11.068                     | 0.317335               | 104  | CNP0117051    | -7.016                     | 0.288316               |
| 6    | CNP0166854    | -10.974                     | 0.288668               | 105  | CNP0222481    | -6.985                     | 0.326354               |
| 7    | CNP0177079    | -10.890                     | 0.317212               | 106  | CNP0195111    | -6.974                     | 0.301049               |
| 8    | CNP0238550    | -10.690                     | 0.27046                | 107  | CNP0232867    | -6.973                     | 0.309019               |
| 9    | CNP0332060    | -10.593                     | 0.214164               | 108  | CNP0240588    | -6.961                     | 0.326817               |
| 10   | CNP0080252    | -10.395                     | 0.320113               | 109  | CNP0295922    | -6.952                     | 0.402075               |
| 11   | CNP0232558    | -10.393                     | 0.333106               | 110  | CNP0304960    | -6.920                     | 0.312691               |
| 12   | CNP0276275    | -10.368                     | 0.355526               | 111  | CNP0186752    | -6.905                     | 0.24359                |
| 13   | CNP0173564    | -10.260                     | 0.274763               | 112  | CNP0148528    | -6.904                     | 0.294248               |
| 14   | CNP0266349    | -10.050                     | 0.341146               | 113  | CNP0172039    | -6.889                     | 0.383917               |
| 15   | CNP0124430    | -10.040                     | 0.219614               | 114  | CNP0181244    | -6.863                     | 0.303806               |
| 16   | CNP0166031    | -9.907                      | 0.219064               | 115  | CNP0377574    | -6.842                     | 0.321651               |
| 17   | CNP0234527    | -9.674                      | 0.22471                | 116  | CNP0162563    | -6.779                     | 0.297872               |
| 18   | CNP0172795    | -9.639                      | 0.317824               | 117  | CNP0276082    | -6.766                     | 0.244136               |
| 19   | CNP0250275    | -9.541                      | 0.216736               | 118  | CNP0235256    | -6.765                     | 0.260073               |
| 20   | CNP0294756    | -9.516                      | 0.307692               | 119  | CNP0257836    | -6.756                     | 0.231598               |
| 21   | CNP0208621    | -9.457                      | 0.312265               | 120  | CNP0138077    | -6.724                     | 0.259901               |
| 22   | CNP0232386    | -9.307                      | 0.340489               | 121  | CNP0292123    | -6.718                     | 0.246954               |
| 23   | CNP0220888    | -9.283                      | 0.332893               | 122  | CNP0134072    | -6.718                     | 0.311867               |
| 24   | CNP0184011    | -9.236                      | 0.25852                | 123  | CNP0243617    | -6.718                     | 0.275454               |
| 25   | CNP0080230    | -9.197                      | 0.258333               | 124  | CNP0244532    | -6.717                     | 0.305671               |
| 26   | CNP0229395    | -9.127                      | 0.225514               | 125  | CNP0309058    | -6.715                     | 0.30459                |
| 27   | CNP0334271    | -9.121                      | 0.304665               | 126  | CNP0131308    | -6.700                     | 0.346774               |
| 28   | CNP0293269    | -9.093                      | 0.224558               | 127  | CNP0373108    | -6.681                     | 0.359356               |
| 29   | CNP0259095    | -9.068                      | 0.216736               | 128  | CNP0300897    | -6.654                     | 0.271923               |

|    |            |        |          |     |            |        |          |
|----|------------|--------|----------|-----|------------|--------|----------|
| 30 | CNP0144047 | -8.946 | 0.22755  | 129 | CNP0243230 | -6.650 | 0.440171 |
| 31 | CNP0226348 | -8.842 | 0.327676 | 130 | CNP0155407 | -6.650 | 0.357962 |
| 32 | CNP0173918 | -8.788 | 0.294286 | 131 | CNP0199670 | -6.641 | 0.329377 |
| 33 | CNP0205945 | -8.680 | 0.226399 | 132 | CNP0216125 | -6.640 | 0.356371 |
| 34 | CNP0104652 | -8.622 | 0.240329 | 133 | CNP0146840 | -6.638 | 0.337349 |
| 35 | CNP0316445 | -8.598 | 0.217082 | 134 | CNP0197004 | -6.624 | 0.273458 |
| 36 | CNP0139619 | -8.594 | 0.317539 | 135 | CNP0377028 | -6.621 | 0.296543 |
| 37 | CNP0277873 | -8.570 | 0.226399 | 136 | CNP0181824 | -6.612 | 0.224324 |
| 38 | CNP0182329 | -8.526 | 0.243056 | 137 | CNP0312223 | -6.604 | 0.322518 |
| 39 | CNP0245710 | -8.521 | 0.228926 | 138 | CNP0171505 | -6.603 | 0.341965 |
| 40 | CNP0214794 | -8.476 | 0.291076 | 139 | CNP0170500 | -6.601 | 0.214097 |
| 41 | CNP0214412 | -8.381 | 0.326667 | 140 | CNP0397180 | -6.600 | 0.44086  |
| 42 | CNP0279503 | -8.294 | 0.272806 | 141 | CNP0166169 | -6.598 | 0.254637 |
| 43 | CNP0138643 | -8.275 | 0.274603 | 142 | CNP0240279 | -6.579 | 0.281879 |
| 44 | CNP0133651 | -8.268 | 0.314176 | 143 | CNP0268715 | -6.575 | 0.344241 |
| 45 | CNP0195932 | -8.242 | 0.219917 | 144 | CNP0107419 | -6.567 | 0.32312  |
| 46 | CNP0209154 | -8.179 | 0.324503 | 145 | CNP0174539 | -6.535 | 0.29465  |
| 47 | CNP0169391 | -8.171 | 0.315018 | 146 | CNP0272446 | -6.534 | 0.3331   |
| 48 | CNP0147502 | -8.158 | 0.269929 | 147 | CNP0291283 | -6.497 | 0.479212 |
| 49 | CNP0245121 | -8.152 | 0.305741 | 148 | CNP0200225 | -6.491 | 0.22094  |
| 50 | CNP0319168 | -8.090 | 0.297778 | 149 | CNP0177868 | -6.491 | 0.257166 |
| 51 | CNP0113508 | -8.086 | 0.332148 | 150 | CNP0129079 | -6.490 | 0.225886 |
| 52 | CNP0145828 | -8.058 | 0.316056 | 151 | CNP0174866 | -6.485 | 0.252853 |
| 53 | CNP0258154 | -8.049 | 0.32478  | 152 | CNP0191008 | -6.470 | 0.390663 |
| 54 | CNP0230781 | -8.045 | 0.298361 | 153 | CNP0277313 | -6.467 | 0.374202 |
| 55 | CNP0155859 | -8.039 | 0.290123 | 154 | CNP0210919 | -6.455 | 0.281938 |
| 56 | CNP0153580 | -7.948 | 0.216918 | 155 | CNP0131061 | -6.443 | 0.399497 |
| 57 | CNP0300194 | -7.904 | 0.303763 | 156 | CNP0349059 | -6.432 | 0.371501 |
| 58 | CNP0347782 | -7.896 | 0.364109 | 157 | CNP0085019 | -6.423 | 0.434409 |
| 59 | CNP0105429 | -7.893 | 0.295673 | 158 | CNP0117429 | -6.420 | 0.320276 |
| 60 | CNP0190921 | -7.879 | 0.301304 | 159 | CNP0085461 | -6.397 | 0.271768 |
| 61 | CNP0196231 | -7.874 | 0.297539 | 160 | CNP0234393 | -6.394 | 0.34949  |
| 62 | CNP0250716 | -7.867 | 0.341176 | 161 | CNP0164346 | -6.391 | 0.316436 |

|    |            |        |          |     |            |        |          |
|----|------------|--------|----------|-----|------------|--------|----------|
| 63 | CNP0314566 | -7.858 | 0.273684 | 162 | CNP0237841 | -6.387 | 0.357052 |
| 64 | CNP0148927 | -7.837 | 0.288889 | 163 | CNP0224794 | -6.382 | 0.320088 |
| 65 | CNP0330352 | -7.806 | 0.282116 | 164 | CNP0263367 | -6.378 | 0.253133 |
| 66 | CNP0331306 | -7.794 | 0.232358 | 165 | CNP0117806 | -6.359 | 0.398196 |
| 67 | CNP0233323 | -7.689 | 0.319917 | 166 | CNP0258703 | -6.352 | 0.287982 |
| 68 | CNP0256714 | -7.663 | 0.221761 | 167 | CNP0244343 | -6.334 | 0.255283 |
| 69 | CNP0184645 | -7.630 | 0.286159 | 168 | CNP0227316 | -6.317 | 0.405096 |
| 70 | CNP0269850 | -7.629 | 0.30593  | 169 | CNP0249449 | -6.311 | 0.25     |
| 71 | CNP0157562 | -7.615 | 0.3329   | 170 | CNP0204042 | -6.290 | 0.347769 |
| 72 | CNP0204837 | -7.601 | 0.354029 | 171 | CNP0201102 | -6.278 | 0.345855 |
| 73 | CNP0080254 | -7.595 | 0.288937 | 172 | CNP0182212 | -6.267 | 0.275444 |
| 74 | CNP0156762 | -7.594 | 0.329032 | 173 | CNP0080245 | -6.266 | 0.302262 |
| 75 | CNP0333972 | -7.566 | 0.272872 | 174 | CNP0155730 | -6.264 | 0.242735 |
| 76 | CNP0329066 | -7.554 | 0.314888 | 175 | CNP0159795 | -6.251 | 0.222689 |
| 77 | CNP0112559 | -7.547 | 0.259459 | 176 | CNP0216868 | -6.240 | 0.315673 |
| 78 | CNP0189555 | -7.518 | 0.218593 | 177 | CNP0225025 | -6.236 | 0.393736 |
| 79 | CNP0146767 | -7.452 | 0.264404 | 178 | CNP0225909 | -6.212 | 0.264186 |
| 80 | CNP0249835 | -7.393 | 0.274792 | 179 | CNP0386711 | -6.192 | 0.401606 |
| 81 | CNP0337775 | -7.389 | 0.382096 | 180 | CNP0295975 | -6.172 | 0.238565 |
| 82 | CNP0153706 | -7.361 | 0.391473 | 181 | CNP0292269 | -6.168 | 0.288779 |
| 83 | CNP0276366 | -7.341 | 0.291107 | 182 | CNP0321554 | -6.167 | 0.452381 |
| 84 | CNP0290328 | -7.337 | 0.435622 | 183 | CNP0211522 | -6.149 | 0.292984 |
| 85 | CNP0114245 | -7.308 | 0.321945 | 184 | CNP0149859 | -6.137 | 0.242123 |
| 86 | CNP0175618 | -7.304 | 0.210618 | 185 | CNP0291183 | -6.137 | 0.268519 |
| 87 | CNP0322284 | -7.301 | 0.316556 | 186 | CNP0220819 | -6.102 | 0.347625 |
| 88 | CNP0130246 | -7.296 | 0.223993 | 187 | CNP0217259 | -6.099 | 0.359375 |
| 89 | CNP0192174 | -7.271 | 0.295129 | 188 | CNP0304008 | -6.096 | 0.309826 |
| 90 | CNP0370542 | -7.233 | 0.407455 | 189 | CNP0236109 | -6.093 | 0.408216 |
| 91 | CNP0242593 | -7.228 | 0.258224 | 190 | CNP0323192 | -6.084 | 0.325181 |
| 92 | CNP0330206 | -7.227 | 0.309713 | 191 | CNP0244923 | -6.062 | 0.375    |
| 93 | CNP0103504 | -7.213 | 0.296296 | 192 | CNP0256270 | -6.036 | 0.33114  |
| 94 | CNP0198200 | -7.210 | 0.270248 | 193 | CNP0214876 | -6.028 | 0.316981 |
| 95 | CNP0308187 | -7.186 | 0.460938 | 194 | CNP0329876 | -6.020 | 0.273458 |

|    |            |        |          |     |            |        |          |
|----|------------|--------|----------|-----|------------|--------|----------|
| 96 | CNP0110235 | -7.152 | 0.334635 | 195 | CNP0118634 | -6.000 | 0.285392 |
| 97 | CNP0133244 | -7.145 | 0.374179 | 196 | CNP0295617 | -5.994 | 0.476563 |
| 98 | CNP0315919 | -7.145 | 0.411619 | 197 | CNP0244936 | -5.980 | 0.311449 |
| 99 | CNP0398413 | -7.094 | 0.259473 |     |            |        |          |

---
